# Supplementary material for: Nozzle Geometry and Particle Size Influence on the Behavior of Low Pressure Cold Sprayed Hydroxyapatite Particles
Source: MDPI journal article supplement (doi:10.3390/coatings12121845), 2022-11-29
Supplement: s1 [file s1]

Supplementary material

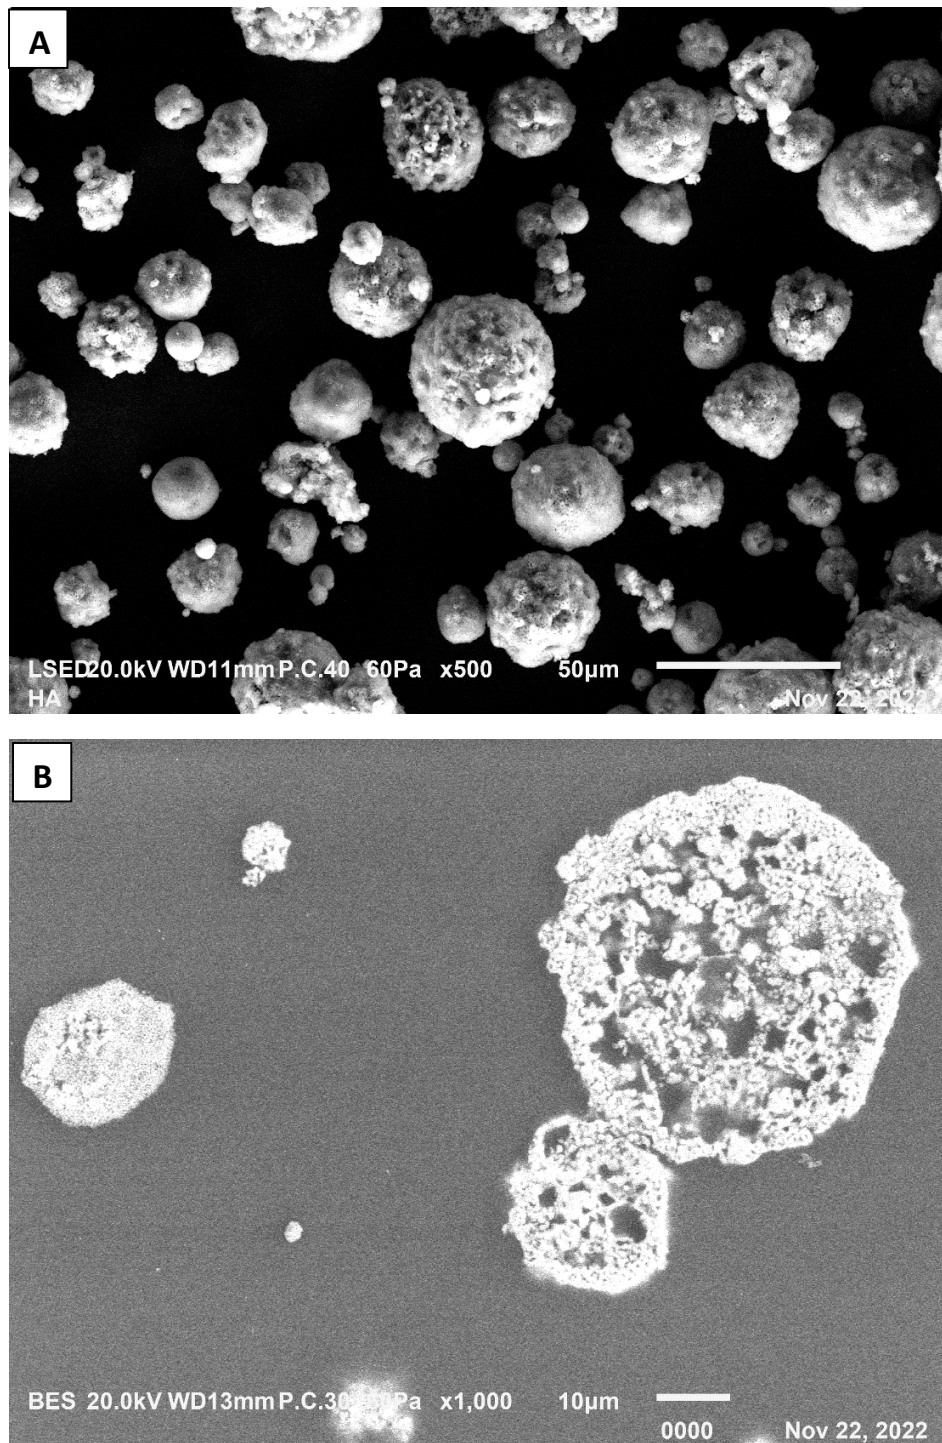

**Figure S1.** SEM images about morphology of BHAp particles. (A) General view of the BHAp powder; (B) cross-sectional view of BHAp particles showing that are spherical and agglomerated.

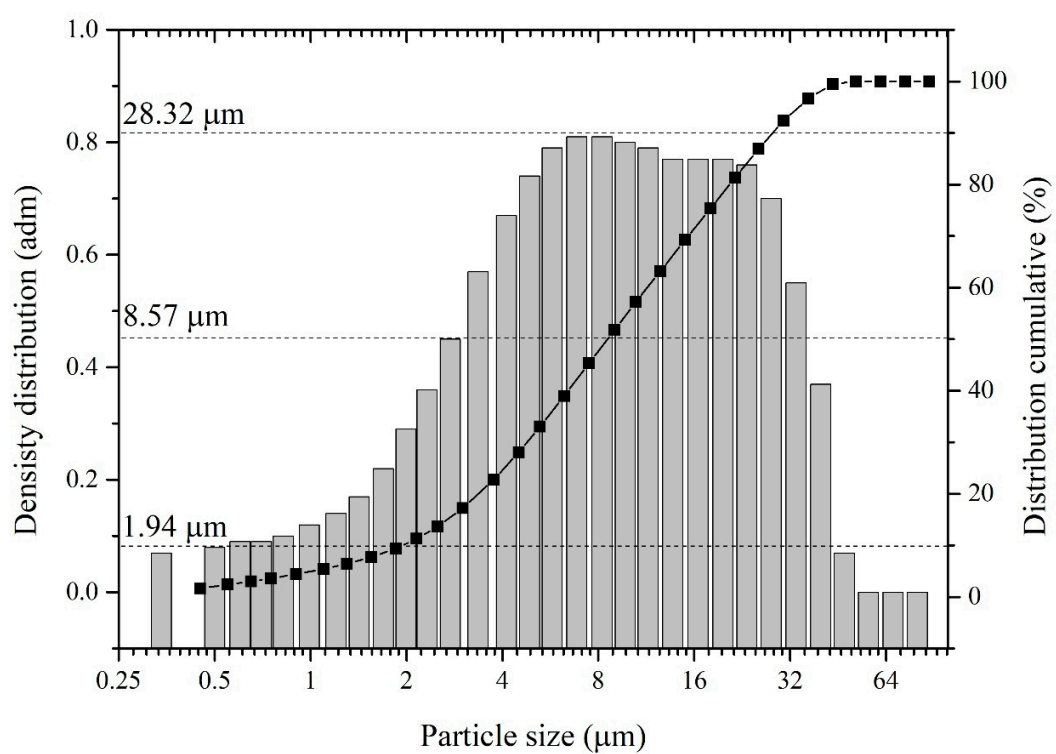

**Figure S2.** Experimental particle size distribution of BHAp powders.

**Table S1.** Heights of the footprints measured by profilometry.

| Nozzle       | SoD (mm) | Maximun high (μm) | Average high (μm) |
|--------------|----------|-------------------|-------------------|
| Conventional | 10       | 26.03             | 3.82              |
|              | 20       | 54.82             | 6.28              |
|              | 30       | 16.95             | 3.96              |
| Modified     | 10       | 14.17             | 2.85              |
|              | 20       | 40.63             | 5.64              |
|              | 30       | 12.79             | 4.08              |
