# Supplementary material for: Nozzle Geometry and Particle Size Influence on the Behavior of Low Pressure Cold Sprayed Hydroxyapatite Particles
Source: MDPI journal article supplement (doi:10.3390/coatings12121845), 2022-11-29
Supplement: s1 [file s1]

Archive with 1 entries (1 files):
- coatings-2051344-Supplementary material.pdf
